# Supplementary material
Source: PubMed Central journal article supplement (PMC8137529)
Supplement: NIHMS1667179-supplement-2.pdf [file NIHMS1667179-supplement-2.pdf]

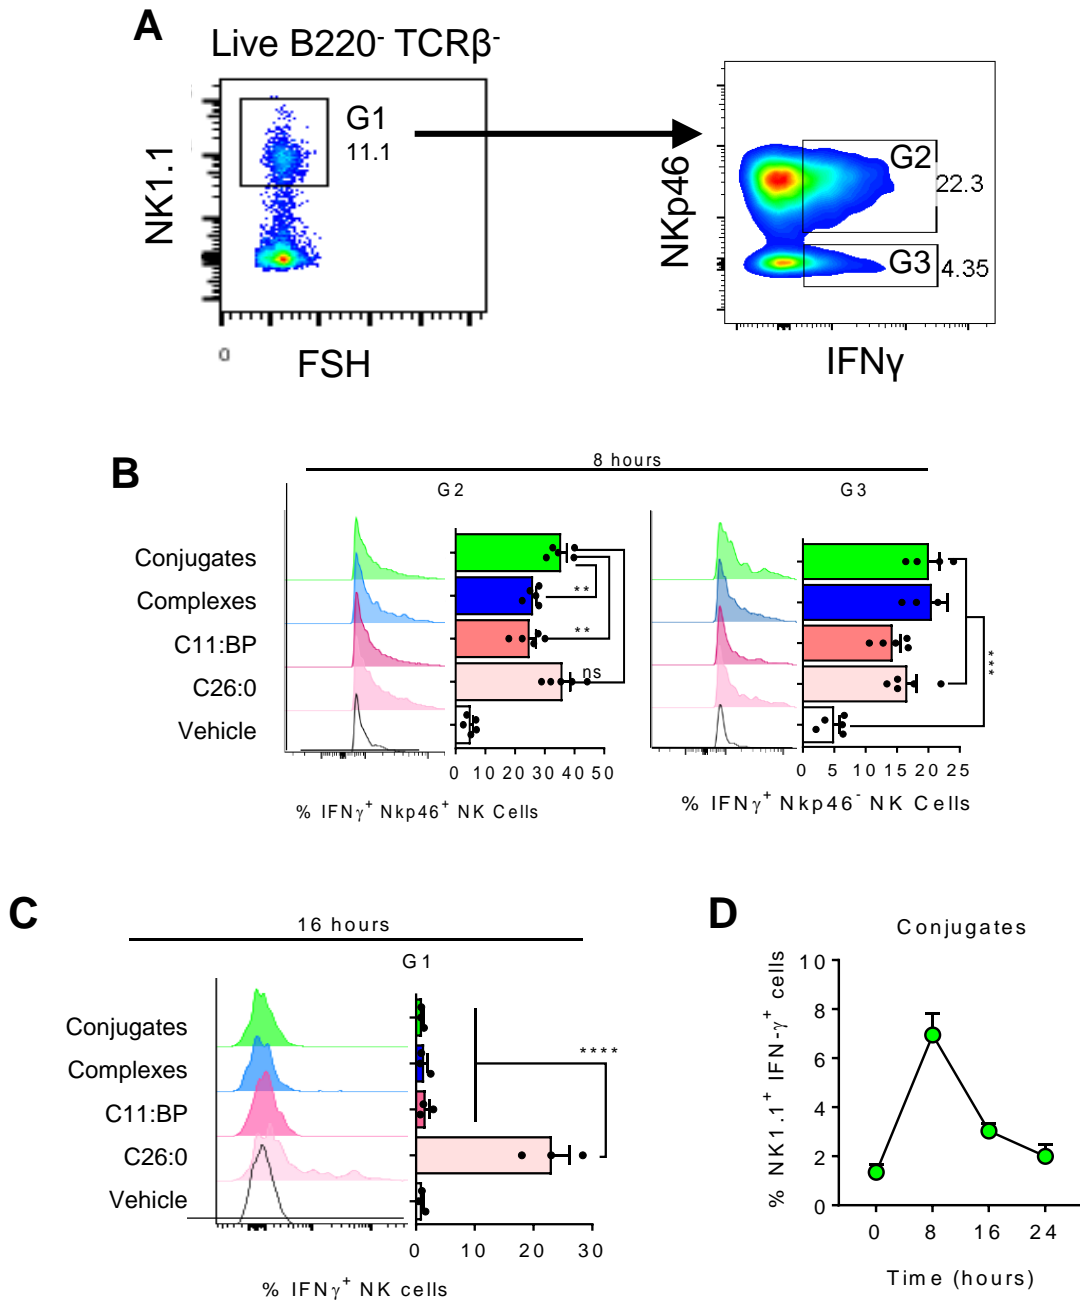

**Figure S2: Conjugates cause transient but potent NK cell transactivation.**

Transactivation of NK cells was determined by intracellular staining of NK cells for IFN- $\gamma$  at 8 hours and 16 hours post stimulation with various adjuvants. **A**. Gating strategy for intracellular IFN- $\gamma$  positive Nkp46 positive and Nkp46 negative NK cells from spleens at 8 hours. **B**. Representative histograms and bar graph for intracellular IFN- $\gamma$  positive Nkp46<sup>+</sup> or Nkp46<sup>-</sup> NK cells purified at 8 hours (left panel) and incubated *in vitro* with brefeldin A for 4 hours prior to intracellular staining. **C**. similar analysis of total NK cells performed 16 hours after *in vivo* injections. **D**. Kinetics of NK transactivation with conjugate stimulation *in vivo*. \*\*P < 0.01, \*\*\*P < 0.001, \*\*\*\*P < 0.0001, ns not significant; 2-way ANOVA and Sidak post-test for multiple comparisons.
