# Supplementary material
Source: PubMed Central journal article supplement (PMC8137529)
Supplement: NIHMS1667179-supplement-3.pdf [file NIHMS1667179-supplement-3.pdf]

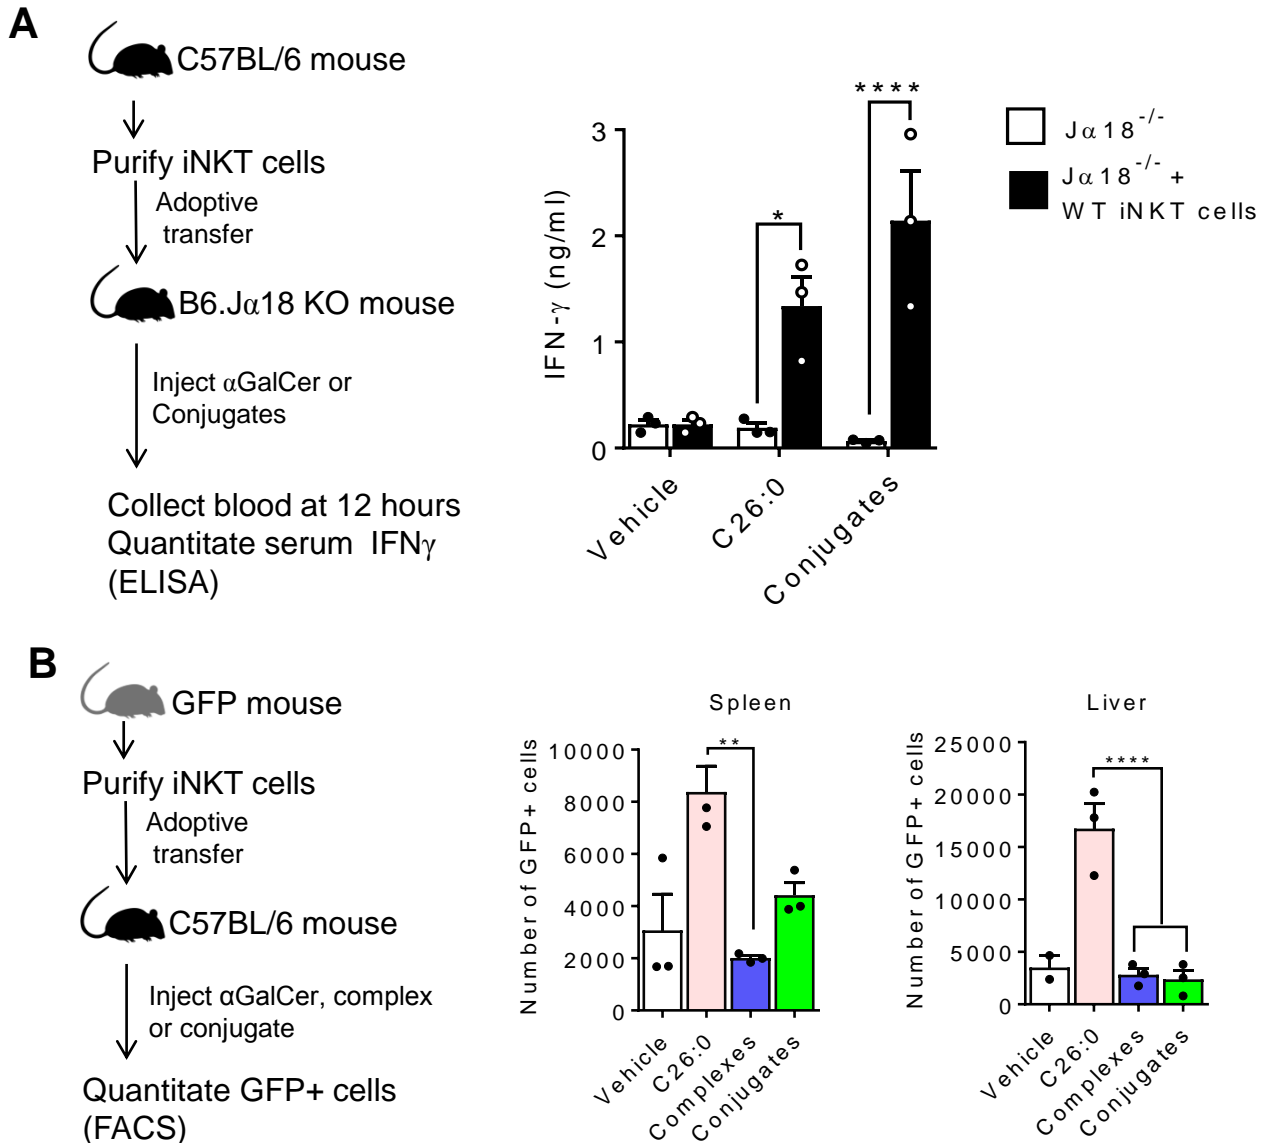

**Figure S3: Responses to conjugates *in vivo*.** **A.** Absence of responses in iNKT cell deficient mice and reconstitution by adoptive transfer of iNKT cells. Serum IFN $\gamma$  was measured in J $\alpha$ 18<sup>-/-</sup> mice which lack iNKT cells 12 hours post injection with indicated stimuli. Mice were either unmanipulated (white bars) or recipients of 100,000 iNKT cells purified from livers of C57BL/6 mice and injected i.v. 16 hours prior to stimulation (solid bars). **B.** iNKT cells purified from livers of GFP transgenic mice were adoptively transferred into C57BL/6 mice. Mice were stimulated with free  $\alpha$ GalCer C26:0 (0.4 nmol), complexes (100  $\mu$ g) or conjugates (100  $\mu$ g) 16 hours after the adoptive transfer. Spleen and liver were analyzed at 72 hours to quantitate GFP positive iNKT cells using FACS and green fluorescent beads to generate absolute cell counts. Data are means of triplicate samples  $\pm$  1SE. \*\* $P$  < 0.01; \*\*\*\* $p$  < 0.0001; two way ANOVA with Sidak test for multiple comparisons.
