# Supplementary material
Source: PubMed Central journal article supplement (PMC8137529)
Supplement: NIHMS1667179-supplement-5.pdf [file NIHMS1667179-supplement-5.pdf]

**A**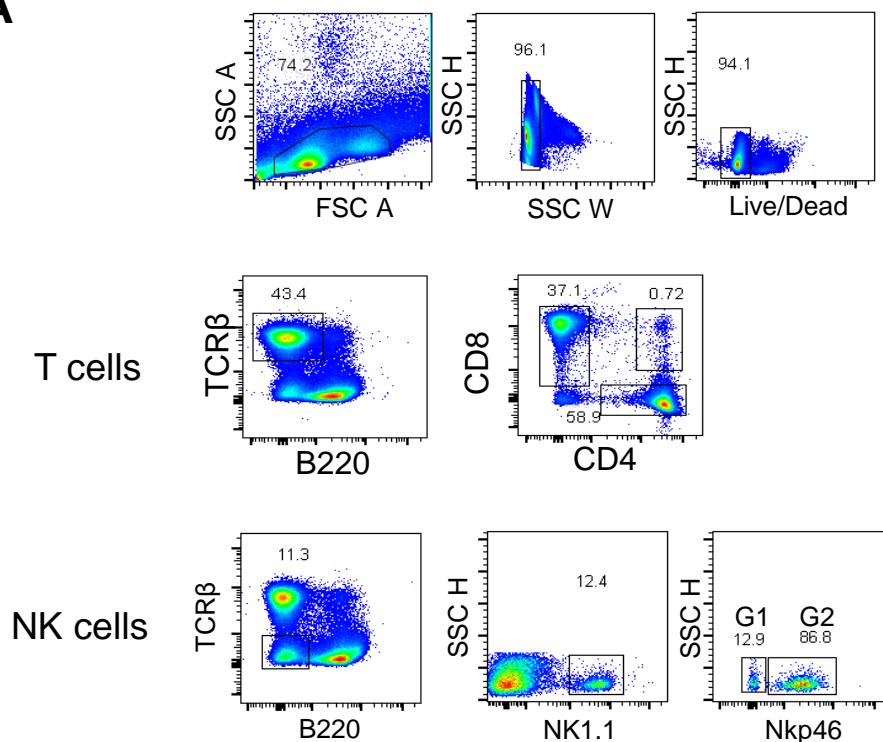**B**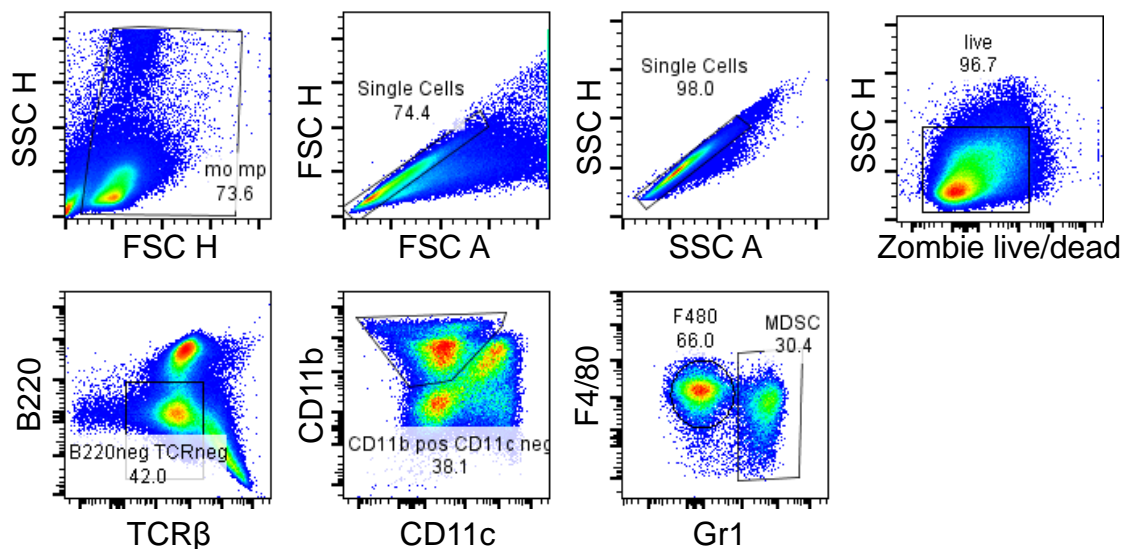

**Figure S5: Gating for FACS analyses of TILs shown in Fig. 5. A.** Gates used for analyses of T cells and NK cells shown in Fig. 5C-F. **B.** Gates used for analyses of myeloid cells in Fig. 5G.
