# Supplementary material
Source: PubMed Central journal article supplement (PMC8137529)
Supplement: NIHMS1667179-supplement-6.pdf [file NIHMS1667179-supplement-6.pdf]

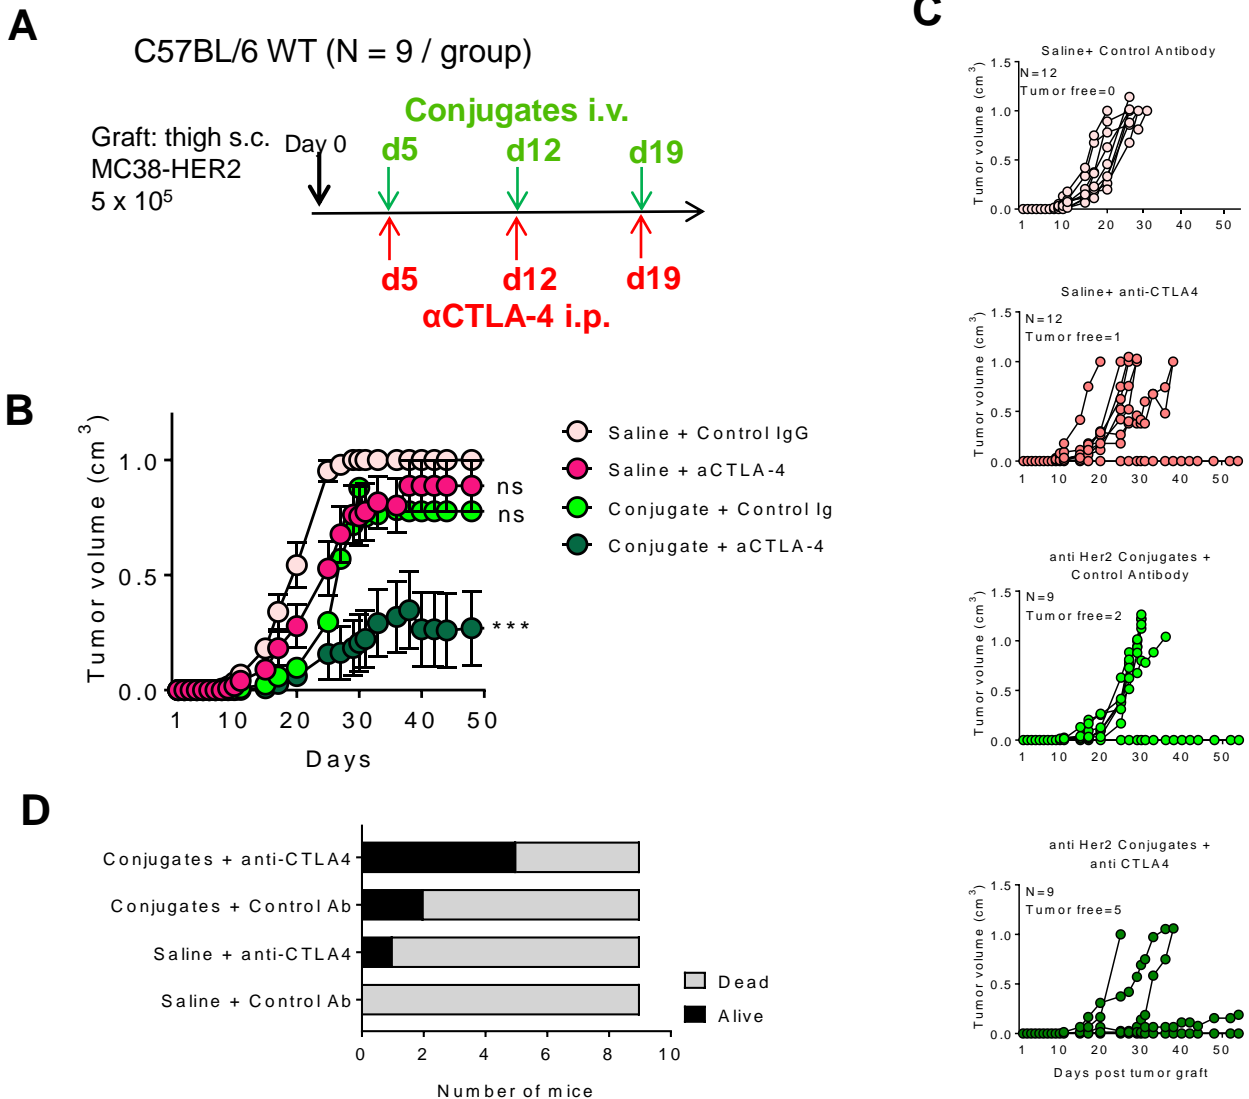

**Figure S6: Targeted conjugates and anti CTLA-4 synergize in C57BL/6 mice. A.** Scheme for combination treatment of MC38-huHER2 tumor bearing wild type C57BL/6 mice with conjugates plus anti-CTLA-4 blocking antibody. **B.** Tumor growth shown as mean values for each treatment group (N = 9 mice per group). **C.** Tumor growth curves for individual mice in each treatment group. The numbers of tumor free mice remaining at the end of observation at day 55 are indicated. **D.** Summary of survival of mice at day 55. \*\*\*P < 0.001; ns, not significant; 2-way ANOVA with Sidak multiple comparison test.
