# Supplementary material
Source: PubMed Central journal article supplement (PMC8137529)
Supplement: NIHMS1667179-supplement-8.pdf [file NIHMS1667179-supplement-8.pdf]

Supplementary Table 1. Antibody conjugates and other reagents for flow cytometry

| Marker (Specificity) | Fluorochrome/Tag | mAb Clone | Supplier (Cat. No.)        | Resource Identifier | Dilution  | Staining |
|----------------------|------------------|-----------|----------------------------|---------------------|-----------|----------|
| mCD1d                | FITC             | 1B1       | BD Biosciences (561756)    | RRID:AB_10894191    | 1:200     | Surface  |
| huHER2               | Biotin           | BAF1129   | Biotechne                  | RRID:AB_355859      | 1:200     | Surface  |
| huCEA                | FITC             | Kat4c     | Millipore (FCMAB204F)      | RRID:AB_11213005    | 1:200     | Surface  |
| 4-1BB                | BV 650           | 1AH2      | BD Biosciences (BDB740499) | RRID:AB_395075      | 1:250     | Surface  |
| B220                 | BV 750           | RA3-6B2   | BioLegend (103261)         | RRID:AB_2734157     | 1:200     | Surface  |
| B220                 | PerCP-Cy5.5      | RA3-6B2   | Tonbo (65-0452-U100)       | RRID:AB_26218921    | 1:200     | Surface  |
| B220                 | APC-Cy7          | RA3-6B2   | BD Biosciences (552094)    | RRID:AB_394335      | 1:200     | Surface  |
| mCD1d tetramer       | APC              | NA        | NIH Tetramer Core Facility | NA                  | 7.5 µg/ml | Surface  |
| CD3ε                 | PE-Cy5           | 145-2C11  | BD Biosciences (553067)    | RRID:AB_394599      | 1:200     | Surface  |
| CD4                  | PerCP            | GK1.5     | BioLegend (100432)         | RRID:AB_893323      | 1:250     | Surface  |
| CD4                  | BV605            | RM4-5     | BD Biosciences (563151)    | RRID:AB_2687549     | 1:250     | Surface  |
| CD8α                 | PB               | 53-6.7    | BD Biosciences (558106)    | RRID:AB_397029      | 1:200     | Surface  |
| CD8α                 | Alexa Fluor 700  | 53-6.7    | eBiosciences (56-0081-82)  | RRID:AB_494005      | 1:500     | Surface  |
| CD11b                | Alexa Fluor 700  | M1/70     | BD Biosciences (557960)    | RRID:AB_396960      | 1:250     | Surface  |
| CD11c                | FITC             | HL3       | BD Biosciences (553801)    | RRID:AB_395060      | 1:250     | Surface  |
| CD25                 | APC-Cy7          | 3C7       | BioLegend (101918)         | RRID:AB_2650982     | 1:250     | Surface  |
| CD27                 | PE/Dazzle 594    | LG.3A10   | BioLegend (124228)         | RRID:AB_2565794     | 1:250     | Surface  |
| CD28                 | PE               | JJ319     | BD Biosciences (559984)    | RRID:AB_397410      | 1:250     | Surface  |
| CD28                 | BV421            | 28.2      | BD Biosciences (562613)    | RRID:AB_2737676     | 1:200     | Surface  |

| Marker (Specificity) | Fluorochrome/Tag     | mAb Clone | Supplier (Cat. No.)       | Resource Identifier | Dilution     | Staining      |
|----------------------|----------------------|-----------|---------------------------|---------------------|--------------|---------------|
| CD40L                | BV480                | Mr1       | BD Biosciences (746825)   | RRID:AB_2744077     | 1:250        | Surface       |
| CD45                 | PE-Cy7               | 30-F11    | BioLegend (103114)        | RRID:AB_312979      | 1:250        | Surface       |
| CD69                 | FITC                 | H1.2F3    | BD Biosciences (553236)   | RRID:AB_394725      | 1:250        | Surface       |
| CD80                 | PE                   | 1G10      | Novus-Bio (NBP1-28029)    | RRID:AB_1852659     | 1:250        | Surface       |
| CD86                 | APC-Cy7              | GL-1      | BioLegend (105030)        | RRID:AB_2244452     | 1:250        | Surface       |
| CTLA-4               | AlexaFluor488        | 9D9       | BioXcell                  | RRID:AB_10949608    | 1:250        | Surface       |
| F4/80                | APC                  | BM8       | BioLegend (123116)        | RRID:AB_893481      | 1:250        | Surface       |
| FoxP3                | eFluor450            | FJK-16s   | eBiosciences (48-5773-82) | RRID:AB_1518812     | 1:200        | Intracellular |
| Gr-1 (Ly6-C, -G)     | PerCP                | RB6-8C5   | BioLegend (108426)        | RRID:AB_893557      | 1:250        | Surface       |
| ICOS                 | Brilliant Violet 510 | C398.4A   | BioLegend (313525)        | RRID:AB_2562642     | 1:250        | Surface       |
| IFN $\gamma$         | Alexa Fluor 700      | XMG1.2    | BD Biosciences (557998)   | RRID:AB_396979      | 1:200        | Intracellular |
| LAG3                 | PerCP-Cy5.5          | C9B7W     | BioLegend (125212)        | RRID:AB_2561517     | 1:250        | Surface       |
| Live/Dead            | DAPI                 | NA        | Sigma (10236276001)       | NA                  | 1 $\mu$ g/mL | Nuclear       |
| Live/Dead            | Fixable Blue         | NA        | ThermoFisher (L34955)     | NA                  | 1:500        | Cytoplasmic   |
| Live/Dead            | Zombie NIR           | NA        | BioLegend (423106)        | NA                  | 1:1000       | Cytoplasmic   |
| NK1.1                | BV421                | PK136     | BD Biosciences (562921)   | RRID:AB_2728688     | 1:250        | Surface       |
| Nkp46                | Alexa Fluor 700      | 29A1.4    | BD Biosciences (561169)   | RRID:AB_10561840    | 1:250        | Surface       |
| OX40                 | Brilliant Violet 605 | OX-86     | BioLegend (119419)        | RRID:AB_2687175     | 1:250        | Surface       |
| PD-1                 | PerCP-eFluor 710     | J43       | eBiosciences (46-9985-82) | RRID:AB_11150055    | 1:200        | Surface       |
| PD-L1                | PE                   | 10F.9G2   | BioLegend (124308)        | RRID:AB_2073556     | 1:250        | Surface       |
| PD-L2                | APC                  | B7-DC     | ThermoFisher (17-5888-42) | RRID:AB_2573238     | 1:250        | Surface       |

| Marker (Specificity) | Fluorochrome/Tag     | mAb Clone | Supplier (Cat. No.)     | Resource Identifier | Dilution | Staining      |
|----------------------|----------------------|-----------|-------------------------|---------------------|----------|---------------|
| ROR $\gamma$ T       | Brilliant Violet 786 | Q31-378   | BD Biosciences (564723) | RRID:AB_2738916     | 1:200    | Intracellular |
| T-bet                | Brilliant Violet 711 | 4B10      | BioLegend (644820)      | RRID:AB_2715766     | 1:200    | Intracellular |
| TCR $\beta$          | PerCP-Cy5.5          | H57-597   | Tonbo (65-5961)         | RRID:AB_2621911     | 1:200    | Surface       |
| Tim-3                | Alexa Fluor 647      | B8.2C12   | BioLegend (134006)      | RRID:AB_1626175     | 1:250    | Surface       |

Supplemental Table 2. Mab and detection reagents used for ELISA analyses

| MAB or reagent           | Application | Species                      | Clone     | Supplier (Cat. #)       | Reagent Identifier | Working Dilution |
|--------------------------|-------------|------------------------------|-----------|-------------------------|--------------------|------------------|
| Anti-IFN $\gamma$        | Capture     | Rat                          | R4-6A2    | BD Biosciences (551216) | RRID:AB_394094     | 1:1000           |
| Biotin anti-IFN $\gamma$ | Detection   | Rat                          | XMG1.2    | BD Biosciences (554410) | RRID:AB_395374     | 1:500            |
| Anti-IL4                 | Capture     | Rat                          | 11B11     | BD Biosciences (554434) | RRID:AB_395390     | 1:500            |
| Biotin anti-IL4          | Detection   | Rat                          | BVD6-24G2 | BD Biosciences (554390) | RRID:AB_395362     | 1:500            |
| Anti-IL12p70             | Capture     | Rat                          | 9A5       | BD Biosciences (554658) | RRID:AB_395493     | 1:500            |
| Biotin anti-IL12p40/p70  | Detection   | Rat                          | C17.8     | BD Biosciences (554476) | RRID:AB_395419     | 1:500            |
| Streptavidin-HRP         | Detection   | <i>Streptomyces avidinii</i> | na        | BD Biosciences (554066) | RRID:AB_2868972    | 1:500            |
